# Supplementary material for: A dual-omics approach for profiling plant responses to biostimulant applications under controlled and field conditions
Source: Front Plant Sci. 2022 Sep 26;13:983772. doi: 10.3389/fpls.2022.983772 (PMC9575556; doi:10.3389/fpls.2022.983772)
Supplement: Supplementary file 2 [file Table_4.xlsx]

## Sheet: BBCH51
Supplementary table 4A. Gene Ontology enrichment analysis of DEGs after ANE treatment at BBCH51 in different comparisons according to dose (1l ha-1 and 2l ha -1) and sampling time (24 h and 48h). Biological process, molecular function and cellular component for down-regulated (blue) and up-regulated (red) genes (adj-p < 0.1 and log2FC ≤ -1) in treated plants compared to the untreated ones.
					GO enrichment analysis
	DEG	2l/ha vs NT, 24h			DOWNREGULATED GENES (2l/ha vs NT, 24h)					UPREGULATED GENES (2l/ha vs NT, 24h)
	genename	log2FC	adj-p							Enrichment FDR	Fold Enrichment	Pathway	Genes
	101260631	-2.75449	0.0424708		No significant enriched GO terms					BIOLOGICAL PROCESS
	544034	3.75893	0.0424708							0.0227259	204.935	Aminoglycan metabolic process	544149
	544066	4.73886	0.0597777							0.00449502	88.6203	Lipid localization	101262798 544034
	544123	7.05005	0.00198705							0.0302131	11.3459	Carbohydrate metabolic process	544149 101253788
	544149	3.82367	0.00198705							MOLECULAR FUNCTION
	101246381	5.65551	0.00198705							6.36383e-05	393.474	Chitinase activity	544149 101253788
	101250522	3.42081	0.00663378							0.0323325	45.9666	Unfolded protein binding	101262304
	101252465	9.01621	0.000132272							0.0055214	26.8767	Hydrolase activity, hydrolyzing O-glycosyl compounds	544149 101253788
	101253788	5.72284	0.000256513							0.0055214	24.4091	Hydrolase activity, acting on glycosyl bonds	544149 101253788
	101259614	3.04193	0.0984055							KEGG
	101262304	4.0455	0.0758808							0.000612718	117.105	Amino sugar and nucleotide sugar metabolism	544149 101253788
	101262798	3.71949	0.0984055							0.0237266	86.2882	Phagosome	101262304
	101262921	3.9151	0.000506383							0.0237266	52.3237	MAPK signaling pathway	544149
										0.0237266	46.4003	Protein processing in endoplasmic reticulum	101262304
										0.0237266	8.00395	Metabolic pathways	544149 101253788
	DEG	1l/ha vs NT, 48h
	genename	log2FC	adj-p		DOWNREGULATED GENES (1l/ha vs NT, 48h)					UPREGULATED GENES (1l/ha vs NT, 48h)
	101244981	-2.3539	0.00808635		Enrichment FDR	Fold Enrichment	Pathway	Genes		Enrichment FDR	Fold Enrichment	Pathway	Genes
	101251136	-4.29337	0.00863024		BIOLOGICAL PROCESS					BIOLOGICAL PROCESS
	543756	-3.01869	0.0174163		0.0142735	312.991	Glutamine metabolic process	543756		0.00470438	1229.61	Negative regulation of peptidase activity	544286
	100191111	-3.09146	0.0222726		0.0142735	229.527	Response to light intensity	101261364		MOLECULAR FUNCTION
	778326	-3.08411	0.0222726		0.0142735	215.181	Cell wall macromolecule catabolic process	101251136		0.00742533	181.205	Enzyme inhibitor activity	544286
	101253281	-3.07167	0.0564427		MOLECULAR FUNCTION
	101261364	-2.41576	0.0564427		0.00870802	625.982	Glutamate-ammonia ligase activity	543756
	544266	-2.72341	0.0606655		0.0108768	275.432	Chitinase activity	101251136
	101264088	-2.84194	0.0658252		0.0216968	98.3686	4 iron, 4 sulfur cluster binding	778326
	101247747	-2.23763	0.0658252		KEGG
	101245993	-2.62375	0.0964485		0.00735045	362.411	Arginine biosynthesis	543756
	101252200	2.53735	0.0055987		0.0155174	81.9738	Amino sugar and nucleotide sugar metabolism	101251136
	544271	3.4685	0.0055987		0.00343919	16.8083	Metabolic pathways	543756 778326 101251136
	101254084	2.11287	0.0155674
	101262903	1.89116	0.0185982
	543954	2.38253	0.0185982
	101246665	2.43473	0.0185982
	544286	4.64508	0.0564427
	100134883	2.3025	0.0964485

## Sheet: BBCH61
Supplementary table 4B. Gene Ontology enrichment analysis of DEGs after ANE treatment at BBCH61 in different comparisons according to dose (1l ha-1 and 2l ha -1) and sampling time (24 h and 48h). Biological process, molecular function and cellular component for down-regulated (blue) and up-regulated (red) genes (adj-p < 0.1 and log2FC ≤ -1) in treated plants compared to the untreated ones.
					GO enrichment analysis
	DEG	1l/ha vs NT, 24h			DOWNREGULATED GENES (1l/ha vs NT, 24h)					UPREGULATED GENES (1l/ha vs NT, 24h)
	genename	log2FC	adj-p		Enrichment FDR	Fold Enrichment	Pathway	Genes		Enrichment FDR	Fold Enrichment	Pathway	Genes
	544082	-2.74801	8.97658e-06		BIOLOGICAL PROCESS					BIOLOGICAL PROCESS
	544097	-1.93183	0.000185378		2.18464e-13	200.836	Photosynthesis, light harvesting in photosystem I	101253380 544310 101256006 101253628 101252151 101265617 101243766		2.42239e-06	526.974	Phloem development	101251462 101249174 101249457
	108491835	-1.65421	0.000543032		0.000204085	80.693	Chlorophyll biosynthetic process	101244717 101257518 101248079		0.000686057	245.921	Cellular response to nitrogen starvation	101251684 101258486
	543758	-1.90293	0.000826213		0.00509799	78.2477	Response to karrikin	101244450 101243864		0.0200368	204.935	Meristem growth	101266413
	101254918	-1.81785	0.000826213		0.00529188	71.7271	Photosynthetic electron transport in photosystem I	101262260 101254882		0.0200368	204.935	Putrescine metabolic process	544209
	101254806	-1.53073	0.000826213		8.65895e-37	51.6435	Photosynthesis	101243638 543973 101245121 101264609 101253380 544310 543978 101248983 101256006 101265249 101265555 101266426 544077 778297 101268297 101266666 101262260 101244717 101253628 101257518 101243864 101252151 101265617 101243766 101248079 101244751 101254882		0.022718	175.658	Positive regulation of flower development	101245336
	101267358	-2.20599	0.00138447		0.0106065	45.3013	Regulation of stomatal movement	778261 543803		0.031297	111.782	Riboflavin metabolic process	101261429
	544061	-2.13979	0.0021751		0.0112253	39.1239	Aminoglycan catabolic process	101267358 544148		0.0464968	61.4804	Calcium ion transmembrane transport	101246688
	101263901	-1.83638	0.00340873		0.000150253	36.6266	Response to cytokinin	543998 101254918 778297 101254882		7.30139e-05	47.2926	Tissue development	101251462 101266413 101249174 101249457
	101256006	-1.6211	0.00340873		2.30191e-11	34.9888	Photosynthesis, light reaction	101253380 544310 101256006 778297 101262260 101253628 101252151 101265617 101243766 101254882		0.00132837	36.1649	Cell redox homeostasis	101244989 101251684 101258486
	101260197	-1.61277	0.00387114		2.30191e-11	26.7457	Response to light stimulus	101252927 101247122 101253380 544310 101256006 101259171 101253628 101243864 101252151 101265617 101243766		0.00132837	35.4694	Reproductive shoot system development	101245336 101266413 101246669
	544148	-1.82602	0.00400359		8.9113e-14	15.9047	Response to abiotic stimulus	543998 778261 101252927 101244450 101247122 101255098 101253380 544310 101256006 101254918 101259171 101253628 101243864 101252151 101265617 101243766 101254882		0.00824404	35.1316	Regulation of reproductive process	101245336 101266413
	101258104	-1.5818	0.00400359		0.00305287	15.1004	Alpha-amino acid biosynthetic process	543998 101247891 101250390 101254617		0.00203036	14.5516	Defense response	101264616 101266928 101263826 101262669
	101268297	-1.47735	0.00400359		0.00228835	10.9229	Alpha-amino acid metabolic process	543998 101247891 101250390 101257194 101254617		0.000245291	12.4833	Anatomical structure development	101245336 101251462 101266413 101249174 101249457 101246669
	778297	-1.32322	0.00400359		0.0111696	9.20561	Response to biotic stimulus	101262263 544148 101243864 101254882		0.00303021	6.4773	Response to stress	101264616 101266928 101251684 101263826 101258486 101262669
	101250012	-1.62812	0.0041052		0.00714006	7.68504	Response to external stimulus	101259171 544148 101243864 101254882 543876		MOLECULAR FUNCTION
	101259494	-1.35822	0.0041052		0.0112253	6.36631	Defense response	101266019 101262263 544148 101243864 101254882		0.00181264	40.5365	Protein-disulfide reductase activity	101244989 101251684 101258486
	101262260	-1.33777	0.00471283		7.98583e-06	5.06309	Organonitrogen compound biosynthetic process	101247851 543998 101248838 101247891 101250390 101254999 544268 101266952 101254712 101254617 101244717 101257518 778362 101248079 101254882		0.00181264	39.2428	Disulfide oxidoreductase activity	101244989 101251684 101258486
	101055528	-1.96143	0.00505541		0.00509799	4.73576	Peptide metabolic process	101247851 101248838 101256588 101254999 544268 101266952 101254712 778362		0.00237507	31.2612	Oxidoreductase activity, acting on a sulfur group of donors	101244989 101251684 101258486
	101266666	-1.28136	0.00523587		0.00967773	4.64898	Peptide biosynthetic process	101247851 101248838 101254999 544268 101266952 101254712 778362		0.019934	13.6623	Electron transfer activity	101244989 101251684 101258486
	101264605	-2.03858	0.00632685		0.00169906	4.15627	Response to stress	543998 778261 101252927 101266019 101255098 101254918 101262263 544148 778362 101243864 101254882
	544268	-1.67047	0.00811456		MOLECULAR FUNCTION
	104647168	-1.64813	0.00848246		1.05238e-09	71.7271	Chlorophyll binding	101253380 544310 101256006 101253628 101252151 101265617 101243766
	101258780	-1.87106	0.00894679		0.049803	35.8635	Chitin binding	101267358 544148
	101245729	-1.22273	0.00923969		0.049803	34.429	Chitinase activity	101267358 544148
	101256721	-1.39178	0.00969575		0.049803	33.1048	Oxidoreductase activity, acting on the CH-CH group of donors, NAD or NADP as acceptor	101244717 101248079
	101248173	-1.49631	0.013541		0.000412679	7.01678	Tetrapyrrole binding	101245153 101253380 544310 101256006 101255814 101253628 101252151 101265617 101243766
	101266426	-1.34117	0.0137444		KEGG
	101249435	-1.27339	0.0137603		9.61008e-23	156.495	Photosynthesis	101244751 101245121 101248983 101254882 101264609 101265249 101265555 101266426 101266666 101268297 543978 544077
	101268669	-1.27595	0.0137722		0.00142946	61.4804	Nitrogen metabolism	543803 543998
	543978	-1.10672	0.0137722		0.000440698	35.8635	Porphyrin and chlorophyll metabolism	101244717 101248079 101257518
	101257186	-1.48471	0.0142634		0.0495616	35.8635	Valine, leucine and isoleucine biosynthesis	101247891
	101248456	-1.43067	0.0142634		0.000672151	29.3429	Glyoxylate and dicarboxylate metabolism	101257194 543973 543998
	544187	-1.22331	0.0142634		0.00958598	22.6507	Carbon fixation in photosynthetic organisms	101266713 543973
	101266019	-1.21453	0.016646		0.0106092	20.4935	Glycine, serine and threonine metabolism	101257194 543808
	101262263	-1.12985	0.0177423		0.000791336	13.8827	Biosynthesis of amino acids	101247891 101250390 101254617 543998
	101252927	-1.45736	0.0195473		0.00139301	11.5534	Carbon metabolism	101254617 101257194 101266713 543973
	101258321	-1.18669	0.0215471		0.0333695	10.3702	Amino sugar and nucleotide sugar metabolism	101267358 544148
	101254950	-1.56728	0.0220593		7.58054e-20	10.0502	Metabolic pathways	101243766 101243864 101244717 101245121 101247891 101248079 101250390 101252151 101253380 101253628 101254617 101254882 101256006 101257194 101257518 101264777 101265617 101266426 101266666 101266713 101267358 543803 543808 543973 543978 543998 544148 544310
	101256427	-1.20751	0.0225651		0.0391533	9.15665	MAPK signaling pathway	101267358 544148
	101266527	-1.07725	0.0233879		0.0193482	7.17271	Ribosome	101247851 101254712 101266952
	104644323	-1.64573	0.0236031		3.36754e-05	6.1745	Biosynthesis of secondary metabolites	101244717 101247891 101248079 101250390 101254617 101257194 101257518 101264777 543808 543973
	101248079	-1.29867	0.0236031
	101265617	-1.13698	0.023668
	101253380	-1.3578	0.0253034
	101248140	-1.0058	0.0254134		DOWNREGULATED GENES (2l/ha vs NT, 24h)					UPREGULATED GENES (2l/ha vs NT, 24h)
	101255098	-1.71134	0.0254992		Enrichment FDR	Fold Enrichment	Pathway	Genes		Enrichment FDR	Fold Enrichment	Pathway	Genes
	101245121	-1.17972	0.0259607		BIOLOGICAL PROCESS					BIOLOGICAL PROCESS
	101255122	-1.0725	0.0259607		1.80325e-05	224.537	Viral process	543973 101268337 543974		0.0317341	717.271	Response to desiccation	544157
	101257194	-1.34623	0.02617		1.80325e-05	204.125	Reductive pentose-phosphate cycle	543973 101268337 543974		0.0317341	260.826	Aminoglycan catabolic process	544149
	101261134	-1.00091	0.0271507		1.80325e-05	204.125	Photosynthesis, dark reaction	543973 101268337 543974		0.0317341	260.826	Chitin metabolic process	544149
	101266952	-1.31042	0.0271937		1.87187e-05	172.721	Photorespiration	543973 101268337 543974		0.0317341	249.486	Stomatal complex development	101258862
	101250535	-1.08288	0.0271937		0.000274304	66.0403	Cellular metabolic compound salvage	543973 101268337 543974		0.0317341	239.09	Aminoglycan metabolic process	544149
	101248611	-1.40758	0.0278828		1.87187e-05	19.9588	Photosynthesis	101243638 3950482 543973 101268337 543974 101252151		0.0348468	197.868	Amino sugar metabolic process	544149
	101268394	-1.41165	0.0291775		0.0268173	11.7559	Carbohydrate biosynthetic process	543973 101268337 543974		0.0352396	179.318	Cell wall macromolecule catabolic process	544149
	101261882	-1.32444	0.0294838		0.0249491	5.80199	Translation	101259190 101245244 101246627 101268403 101248722		0.0404206	127.515	Carbohydrate derivative catabolic process	544149
	543876	-1.33117	0.0330389		0.0249491	5.77513	Peptide biosynthetic process	101259190 101245244 101246627 101268403 101248722		0.0404206	124.743	Plant epidermis development	101258862
	101248983	-1.22286	0.0337386		0.0268173	5.44728	Amide biosynthetic process	101259190 101245244 101246627 101268403 101248722		0.0404206	117.105	Defense response to fungus	544149
	101257400	-1.56305	0.0354736		0.018403	5.17963	Carbohydrate metabolic process	101256721 543973 101268337 543915 543974 101254426		0.0458049	72.635	Cellular response to abscisic acid stimulus	101258862
	101243638	-1.35263	0.0354736		MOLECULAR FUNCTION					0.0458049	72.635	Cellular response to alcohol	101258862
	101245586	-1.13553	0.0355083		1.78977e-05	249.486	Ribulose-bisphosphate carboxylase activity	543973 101268337 543974		0.0458049	71.7271	Response to acid chemical	544157
	101243766	-1.18688	0.0356323		0.0101729	49.8971	Nutrient reservoir activity	101250583 101254918		0.0317341	28.6908	Response to oxygen-containing compound	544157 101258862
	101268869	-1.40954	0.0356404		0.0114406	44.0269	Manganese ion binding	101250583 101254918		0.0399235	15.1603	Response to chemical	544157 101258862
	104649487	-1.62287	0.0369324		0.00716033	20.2286	Carbon-carbon lyase activity	543973 101268337 543974		MOLECULAR FUNCTION
	101248838	-1.39893	0.0374369		0.00339891	14.8209	Monooxygenase activity	543973 101268337 543974 101258974		0.0347936	229.527	Chitinase activity	544149
	101265249	-1.09469	0.0374369		0.00299026	10.9104	Lyase activity	543973 101268337 543803 543974 101245200		KEGG
	101256588	-1.1844	0.0387157		0.0307168	6.75807	Structural constituent of ribosome	101259190 101246627 101268403 101248722		0.0232988	68.3115	Amino sugar and nucleotide sugar metabolism	544149
	101254999	-1.52209	0.0387371		0.000955986	4.54863	Oxidoreductase activity	543973 101268337 101249610 543974 101250586 101258974 101243905 101252103 100134875 101265784 101258916		0.0232988	61.0443	MAPK signaling pathway	544149
	101252943	-1.35444	0.0387371		KEGG					0.0232988	56.8135	Endocytosis	101263355
	101257518	-1.06853	0.0391628		3.45763e-06	68.0415	Glyoxylate and dicarboxylate metabolism	543973 101268337 543974 101257194
	101259181	-1.23946	0.0392727		0.0352394	62.3714	Valine, leucine and isoleucine biosynthesis	101247891
	101253247	-1.17479	0.0400743		0.000115404	59.0887	Carbon fixation in photosynthetic organisms	543973 101268337 543974
	101254712	-1.21483	0.0410142		0.0352394	53.4612	Nitrogen metabolism	543803
	101263830	-1.29877	0.0429263		0.00284387	45.361	Photosynthesis	3950482 101265784
	101251485	-1.49491	0.0435951		0.0433357	39.3924	Butanoate metabolism	101247891
	101252151	-1.40996	0.0435951		0.0459069	34.0208	Pantothenate and CoA biosynthesis	101247891
	101247891	-1.03178	0.044212		0.0002267	20.0928	Carbon metabolism	543973 101268337 543974 101257194
	544310	-1.11223	0.0457505		0.0049085	12.4743	Ribosome	101259190 101268403 101248722
	101250246	-1.06384	0.0457505		9.75633e-07	7.30796	Metabolic pathways	3950482 543973 101252945 101268337 543803 543974 101247891 101257194 100134875 101265784 101258916 101252151
	101262378	-1.2519	0.0479382		0.00145199	6.21986	Biosynthesis of secondary metabolites	543973 101268337 543974 101247891 101257194 100134875
	101259171	-1.13942	0.0479382
	101244450	-1.17729	0.0497867
	101264784	-1.06252	0.0512431		DOWNREGULATED GENES (1l/ha vs NT, 48h)					UPREGULATED GENES (1l/ha vs NT, 48h)
	101246976	-1.41428	0.0512569		Enrichment FDR	Fold Enrichment	Pathway	Genes		Enrichment FDR	Fold Enrichment	Pathway	Genes
	101252938	-1.20989	0.0512569		BIOLOGICAL PROCESS					MOLECULAR FUNCTION
	101257969	-1.01265	0.0525547		0.00651753	74.0409	Fluid transport	101055566 778315		0.0213773	302.009	Oxidoreductase activity, acting on paired donors, with incorporation or reduction of molecular oxygen, NAD(P)H as one donor, and incorporation of one atom of oxygen	101258933
	101253628	-1.07279	0.0535718		0.0102874	50.4824	Aminoglycan catabolic process	101267358 544148		0.0213773	170.441	Monooxygenase activity	101258933
	101248194	-1.09048	0.0580568		0.0165662	33.6549	Xyloglucan metabolic process	544272 543915		0.0213773	85.6443	Iron ion binding	101258933
	101262019	-1.09863	0.0583441		0.00176768	23.1378	Cell wall macromolecule metabolic process	544272 543915 101267358 544148		0.0213773	83.1618	Oxidoreductase activity, acting on paired donors, with incorporation or reduction of molecular oxygen	101258933
	101255814	-1.18748	0.0595754		0.0340254	22.6656	Defense response to fungus	101244954 544148		0.0213773	67.6405	Heme binding	101258933
	778261	-1.53754	0.0602852		0.0102874	16.9992	Lipid transport	101244954 101266080 778214		0.0213773	62.3714	Tetrapyrrole binding	101258933
	544077	-1.02318	0.0602852		0.00451636	15.1104	Immune system process	543726 101244954 100134875 544148		0.0396012	28.8592	Transition metal ion binding	101258933
	101247122	-1.41945	0.0611556		0.00176768	14.8478	Response to biotic stimulus	543726 101244954 100134875 101262263 544148
	101259741	-1.16846	0.0611556		0.000506225	11.5004	Defense response	101261650 543726 101266019 101244954 100134875 101262263 544148
	101267302	-1.30838	0.0624668		0.00451636	9.91619	Response to external stimulus	543726 101244954 101252996 100134875 544148
	101245583	-1.12909	0.0624668		0.0102874	9.87211	Photosynthesis	101243638 543973 543978 101256006
	100147717	-1.04959	0.0624668		0.00451636	9.84586	Polysaccharide metabolic process	543726 544272 101248642 543915 544148
	101259710	-1.04901	0.0634385		0.00189446	9.71382	Cell wall organization or biogenesis	543726 544272 101248642 543915 101267358 544148
	101257241	-1.02318	0.0647255		0.000506225	6.40492	Carbohydrate metabolic process	101261650 543726 544272 543973 101248642 543915 101255800 101254849 101267358 544148
	543808	-1.25566	0.0655932		0.00056471	5.36292	Response to stress	544084 101261650 543726 101266019 101244954 101259439 101255098 101254918 100134875 101262263 544148
	101266713	-1.16103	0.0655932		MOLECULAR FUNCTION
	101244717	-1.12668	0.0655932		0.000668274	69.4133	Water transmembrane transporter activity	101055566 101255098 778315
	101244697	-1.19222	0.0683999		0.0103472	55.5306	Beta-glucosidase activity	101261650 101254849
	101263969	-1.0612	0.0683999		0.0126336	44.4245	Chitinase activity	101267358 544148
	101257160	-1.01378	0.070287		0.0132724	41.1338	Glucosidase activity	101261650 101254849
	101250811	-1.41671	0.0704154		0.0149014	37.0204	Nutrient reservoir activity	101250583 101254918
	543998	-1.05177	0.0744182		0.0155391	34.7067	Xyloglucan:xyloglucosyl transferase activity	544272 543915
	543966	-1.33479	0.0750153		0.016186	32.6651	Manganese ion binding	101250583 101254918
	101247851	-1.07187	0.0750153		0.040393	17.9131	NADP binding	101255800 101258974
	101254617	-1.01986	0.0759861		0.0035685	14.4235	Passive transmembrane transporter activity	101055566 101255098 778315 101251423
	543512	-1.44964	0.077813		0.0164091	12.3401	Serine-type endopeptidase activity	101257599 543726 101244074
	101264609	-1.07553	0.0795147		0.00209703	9.10338	Hydrolase activity, hydrolyzing O-glycosyl compounds	101261650 544272 543915 101254849 101267358 544148
	101245153	-1.42989	0.0802027		0.0403677	8.54318	Serine hydrolase activity	101257599 543726 101244074
	101244751	-1.14868	0.0802027		0.0026723	8.26759	Hydrolase activity, acting on glycosyl bonds	101261650 544272 543915 101254849 101267358 544148
	778362	-1.14084	0.0824231		KEGG
	543803	-1.13537	0.0824231		0.0421773	42.7159	Photosynthesis	101256006
	101254882	-1.09999	0.0834856		0.00598345	41.1338	Stilbenoid, diarylheptanoid and gingerol biosynthesis	101252173 101253859
	101253410	-1.08271	0.0844215		0.0421773	39.6647	Nitrogen metabolism	543756
	101259256	-1.147	0.0855005		0.0435611	34.7067	Diterpenoid biosynthesis	101262489
	101243864	-1.12243	0.086158		0.00758884	32.6651	Flavonoid biosynthesis	101252173 101253859
	101260226	-1.06223	0.0878447		0.00788816	29.2267	Carbon fixation in photosynthetic organisms	543973 101255800
	101248710	-1.05663	0.0908683		0.0435795	29.2267	Fatty acid elongation	101268510
	101265478	-1.34988	0.0918672		0.0435795	29.2267	Arginine biosynthesis	543756
	101265555	-1.0758	0.0918672		0.00903545	25.2412	Glyoxylate and dicarboxylate metabolism	543973 543756
	101245890	-1.05366	0.0923353		0.00598345	16.4943	Phenylpropanoid biosynthesis	544084 101252173 101253859
	101248969	-1.05096	0.0923353		0.0278198	13.2216	Amino sugar and nucleotide sugar metabolism	101267358 544148
	544217	-1.00779	0.0925765		0.0306521	11.815	MAPK signaling pathway	101267358 544148
	101264777	-1.00632	0.0927476		0.0417133	9.49242	Plant-pathogen interaction	101250538 101268510
	101250390	-1.43101	0.097239		0.0421773	8.95656	Biosynthesis of amino acids	543756 101255800
	101252420	-1.54773	0.0980695		0.0435611	7.45378	Carbon metabolism	543973 101255800
	101264910	-1.09936	0.0980695		0.000493112	6.15298	Biosynthesis of secondary metabolites	544084 543973 101262489 101252173 101255800 101268510 100134875 101253859
	543973	-1.05555	0.0982114		3.70386e-05	5.42203	Metabolic pathways	544084 543973 543756 101252173 543978 101256006 101255800 101268510 100134875 101267358 544148 101253859
	101248220	-1.0543	0.0997651
	101251684	2.71548	1.02563e-10
	101247655	2.09996	2.14442e-05
	544008	2.47512	3.7579e-05		DOWNREGULATED GENES (2l/ha vs NT, 48h)					UPREGULATED GENES (2l/ha vs NT, 48h)
	101245664	2.79484	4.69026e-05		Enrichment FDR	Fold Enrichment	Pathway	Genes		Enrichment FDR	Fold Enrichment	Pathway	Genes
	101259182	1.51731	6.81006e-05		BIOLOGICAL PROCESS					BIOLOGICAL PROCESS
	544015	3.43281	8.19551e-05		0.0325954	159.394	Cell wall polysaccharide metabolic process	543915		0.0250616	573.817	Regulation of translational elongation	544268
	101258486	2.14137	0.000132601		0.0325954	103.39	Lipid localization	778214		0.0250616	312.991	Chitin metabolic process	544149
	101247768	1.86326	0.000185378		MOLECULAR FUNCTION					0.0250616	312.991	Amino sugar catabolic process	544149
	101246669	2.49611	0.000330537		0.0195009	358.635	Xyloglucan:xyloglucosyl transferase activity	543915		0.0250616	286.908	Aminoglycan metabolic process	544149
	101263239	1.5089	0.000543032		0.0404919	51.0059	Lipid binding	778214		0.0278333	215.181	Cell wall macromolecule catabolic process	544149
	101267682	2.1585	0.000826213							0.0293333	160.135	Negative regulation of cellular amide metabolic process	544268
	101262669	2.06813	0.00106442							0.0293333	153.018	Carbohydrate derivative catabolic process	544149
	101264616	1.94873	0.00138447							0.032598	98.3686	Negative regulation of protein metabolic process	544268
	100147719	1.44059	0.0021751							0.0250616	40.7444	Defense response	543986 544149
	101267424	1.59476	0.00275255							0.011032	23.8263	Carbohydrate metabolic process	543986 544149 101253788
	101254783	1.43102	0.00340873							MOLECULAR FUNCTION
	544209	1.83434	0.00340873							0.00228652	983.686	Glucan endo-1,3-beta-D-glucosidase activity	543986
	101252777	1.55603	0.00374237							4.54964e-05	550.864	Chitinase activity	544149 101253788
	101244100	1.55084	0.00400359							0.00577823	222.123	Ribosome binding	544268
	112941974	1.52727	0.00447098							4.69311e-05	56.441	Hydrolase activity, hydrolyzing O-glycosyl compounds	543986 544149 101253788
	101249864	2.34379	0.0054255							KEGG
	104648655	1.92491	0.00615239							0.000175619	163.948	Amino sugar and nucleotide sugar metabolism	544149 101253788
	112940015	1.89525	0.00803334							0.0135777	73.2532	MAPK signaling pathway	544149
	101251579	1.42788	0.00843445							0.0135777	11.2055	Metabolic pathways	544149 101253788
	101266413	1.44837	0.00843445
	101252191	1.59619	0.00843445
	101265946	1.89311	0.00843445
	101248560	1.30958	0.00894524
	101258933	1.71075	0.00894524
	101257615	1.91425	0.00894524
	778259	1.36564	0.00929005
	101248357	1.635	0.00929005
	101256102	1.76251	0.0136777
	101244667	1.41316	0.0137603
	104647159	1.78942	0.0142634
	101254183	1.15904	0.0176039
	101260734	1.67981	0.0219325
	101261429	1.42681	0.022921
	101245725	1.59546	0.0236916
	101261656	1.47197	0.0254134
	101265598	2.03183	0.0255325
	101262808	1.71456	0.0259607
	101251462	1.68086	0.02617
	101248067	1.46676	0.0267851
	101245336	1.4266	0.0271937
	101259614	1.4858	0.0337386
	101254163	1.47537	0.0356323
	101266928	1.90713	0.0356323
	101260459	2.55631	0.0357061
	101245126	1.39725	0.037683
	101266923	1.66881	0.0462603
	101249225	1.06365	0.0476518
	101244989	1.58548	0.049426
	101254084	1.15514	0.0497867
	101245477	1.28441	0.0501683
	101256179	1.28355	0.0509109
	101249174	1.20828	0.0602852
	101249457	1.53634	0.0602852
	101256154	1.19875	0.0634385
	101263826	1.30821	0.0634385
	101246688	1.31239	0.0796591
	101266201	1.2045	0.0847044
	101253856	1.33364	0.0918672
	543530	1.35551	0.0918672
	101251091	1.45018	0.0918672
	101254676	1.06027	0.0923353
	101247679	1.22517	0.0988071
	DEG	2l/ha vs NT, 24h
	genename	log2FC	adj-p
	543803	-1.40991	5.51598e-07
	543973	-1.25938	6.95124e-07
	778328	-1.47468	3.90648e-06
	101246976	-1.78904	7.53647e-06
	101254950	-2.00528	1.03867e-05
	101250583	-1.91621	1.03867e-05
	3950482	-1.50637	1.03867e-05
	101266265	-2.15914	1.38979e-05
	100147717	-1.55281	3.48905e-05
	100134875	-1.17449	9.30135e-05
	104645884	-1.28902	0.000128896
	101254918	-1.20173	0.000128896
	543974	-1.13898	0.000128896
	101268337	-1.01617	0.000128896
	101263132	-1.36454	0.000398277
	101245554	-1.14649	0.000822218
	101252938	-1.46619	0.00155656
	101258780	-1.96568	0.00206313
	101245993	-1.86823	0.00206313
	778214	-1.84006	0.00206313
	101259757	-1.10053	0.00206313
	101261882	-1.20793	0.00246103
	101247891	-1.02005	0.00246103
	101251485	-1.74616	0.00350144
	101250012	-1.3123	0.00354528
	101266327	-1.13843	0.00372849
	101248611	-1.46965	0.00394471
	101256721	-1.0339	0.00456307
	544276	-1.02027	0.00456307
	101245244	-1.07545	0.00548386
	101259190	-1.65737	0.00554367
	101252103	-1.20096	0.00554367
	543915	-1.61535	0.00554968
	101265784	-1.20353	0.00554968
	3950468	-1.08074	0.00554968
	101248173	-1.05894	0.00554968
	101254426	-1.01669	0.00554968
	101055528	-1.61922	0.00688609
	101252943	-1.35934	0.00688609
	101252151	-1.3078	0.00837671
	101265588	-1.85098	0.0089136
	101247655	-1.39863	0.00941647
	101268394	-1.44199	0.0106649
	101246627	-1.1525	0.0106649
	101250586	-1.27822	0.0131331
	778315	-1.07576	0.0134533
	101245200	-1.22508	0.0168293
	101257194	-1.14979	0.0168293
	101262956	-1.48356	0.0182516
	101248456	-1.14417	0.0182516
	101252945	-1.01421	0.019824
	543512	-1.43884	0.0212188
	101246756	-1.25545	0.023802
	101248905	-1.24324	0.0261094
	101243905	-1.14938	0.0261094
	3950465	-1.0386	0.0305905
	101263579	-1.23467	0.0345063
	101256785	-1.35094	0.036292
	101267395	-1.11073	0.036292
	101260226	-1.01843	0.036292
	101249155	-1.28112	0.0375891
	101248722	-1.20687	0.0375891
	101268403	-1.1526	0.0375891
	101258916	-1.20378	0.0424916
	101264237	-1.05534	0.0424916
	101244241	-1.23237	0.0513987
	778360	-1.04516	0.0513987
	543795	-1.43324	0.0526908
	101259584	-1.01774	0.0526908
	101243638	-1.04488	0.0581787
	3950385	-1.01927	0.0650203
	100736546	-1.34888	0.0675701
	101258974	-1.1069	0.0675701
	101257400	-1.18915	0.0749891
	101055532	-1.10288	0.0800735
	101250931	-1.00622	0.0805337
	104646389	-1.11689	0.0898819
	101249610	-1.33237	0.0987911
	100301928	1.45828	0.00210923
	544103	1.37671	0.00350144
	101254676	1.22675	0.00456307
	101246209	1.17346	0.00554968
	101258862	1.31172	0.00608424
	101261140	1.58382	0.00682152
	544123	4.6874	0.00986598
	101263355	1.56078	0.0124222
	101260459	2.4487	0.0261094
	101263123	1.03081	0.0375891
	544157	1.01234	0.0633624
	544149	1.13663	0.0972841
	DEG	1l/ha vs NT, 48h
	genename	log2FC	adj-p
	101254237	-7.65545	0.000839481
	544061	-2.81153	1.97276e-15
	544082	-2.98365	2.77716e-13
	101261260	-2.63335	7.86659e-13
	101267358	-2.71984	1.73284e-12
	544097	-2.0131	2.32977e-08
	101252996	-3.05529	2.50124e-07
	543758	-2.23646	2.50124e-07
	101264107	-2.70348	4.44614e-06
	543987	-3.19862	5.04185e-06
	101268888	-2.90188	9.06839e-06
	544084	-2.42971	1.59202e-05
	101257400	-2.0055	1.89947e-05
	101246670	-3.43855	3.00384e-05
	109120238	-3.27062	3.00384e-05
	101244365	-2.98864	3.08322e-05
	101253820	-2.92578	3.08322e-05
	100191111	-2.78948	0.000112494
	544148	-1.71454	0.000123196
	101251123	-3.35522	0.000202003
	101261650	-2.70049	0.000202003
	101265588	-2.35201	0.000248994
	101259357	-1.95752	0.000302986
	101251570	-1.65216	0.000322106
	104644967	-5.063	0.000333277
	543915	-1.81957	0.000386613
	101251423	-2.93511	0.000489091
	101266181	-1.75998	0.000489091
	101254950	-1.58147	0.000489091
	101244801	-1.92745	0.000568407
	112940456	-1.64054	0.00059253
	101254849	-2.46771	0.000924328
	101250583	-1.89578	0.000924328
	101264605	-2.00522	0.00108598
	101260969	-3.30917	0.00130509
	101253859	-3.65489	0.00188597
	101255245	-2.09131	0.00199006
	101262263	-1.86669	0.00199006
	101267281	-3.1183	0.00239297
	101262141	-4.69007	0.00273237
	100736441	-1.53964	0.00274198
	104646239	-3.08643	0.0035492
	544272	-2.20895	0.0035492
	101244206	-2.17601	0.0035492
	101263049	-1.52222	0.00477079
	101250247	-2.53725	0.00530287
	101244811	-1.24419	0.00530287
	101246056	-3.471	0.00547401
	101250012	-1.50936	0.00547595
	101245251	-3.03632	0.00720675
	101055566	-1.66647	0.00720675
	101246356	-2.76378	0.00787997
	544111	-2.12212	0.00813217
	100134875	-1.37668	0.00813217
	101253684	-2.07778	0.00819925
	101251962	-1.55193	0.00852413
	101244981	-1.30609	0.00884135
	101254918	-1.38137	0.0104141
	101248242	-2.76877	0.010533
	101259803	-2.59163	0.010533
	104645422	-2.30262	0.0109447
	101258974	-1.53959	0.0116687
	543978	-1.14939	0.0128509
	101263579	-1.55627	0.0138874
	101268510	-2.46206	0.0143645
	101244697	-1.47959	0.0144461
	101263269	-2.2767	0.0150691
	112940994	-4.26148	0.0166613
	101254023	-3.65766	0.0166613
	101243638	-1.48689	0.0166613
	101258718	-1.76523	0.0177983
	101255440	-1.56678	0.0188427
	101244628	-1.48815	0.0188427
	101259439	-1.60877	0.0201302
	101244606	-1.77756	0.0225549
	101248969	-1.4824	0.0229541
	101254229	-2.44806	0.0261291
	100529102	-1.87294	0.0264649
	101258225	-3.86776	0.0272225
	544259	-1.71061	0.0279924
	544266	-2.35837	0.0290469
	101265966	-1.65586	0.0290469
	101262449	-1.5484	0.0290469
	543973	-1.25392	0.0290469
	101247333	-2.06511	0.0315927
	101243905	-1.34611	0.0316238
	112942131	-4.65746	0.0317773
	778214	-1.50571	0.035843
	778315	-1.38721	0.035843
	543726	-1.83098	0.0361402
	101244954	-1.4427	0.0371164
	101265837	-1.97435	0.0372811
	543756	-1.48378	0.0372811
	101244074	-3.73461	0.0374314
	101256006	-1.17074	0.038626
	104646958	-3.46047	0.0388341
	543656	-1.90233	0.0402278
	101254198	-1.26875	0.0402278
	101262935	-2.04506	0.0407942
	101266456	-3.25509	0.0435321
	104647171	-4.67914	0.0444198
	101256225	-2.66322	0.0455933
	101258050	-5.51868	0.0467217
	101246330	-2.15035	0.0467217
	101252173	-1.86965	0.0473213
	101268892	-3.08513	0.0473749
	101252644	-1.99729	0.0481229
	101268384	-1.40829	0.0481229
	101248642	-1.23589	0.0481229
	101255645	-1.23201	0.0481229
	543760	-1.21209	0.0481229
	101266019	-1.20036	0.0481229
	101250538	-2.67468	0.0489327
	101256393	-2.29944	0.050423
	101249539	-3.62419	0.0507695
	101245886	-1.33257	0.0509397
	101257599	-2.41392	0.0512388
	101268457	-1.5771	0.0512388
	112940481	-5.47044	0.0538865
	112941286	-2.37534	0.0553719
	101260261	-2.17469	0.0553719
	101244055	-1.94281	0.0553719
	101246976	-1.59085	0.0553719
	101259741	-1.29774	0.0553719
	101260454	-1.98001	0.0573742
	101265438	-3.02355	0.0574858
	112941555	-2.76195	0.0585432
	101248838	-1.22738	0.0585432
	112940161	-2.37143	0.0661215
	101266080	-1.10195	0.0672624
	101255351	-2.01827	0.0689955
	101255800	-1.02239	0.0689955
	109118969	-4.49303	0.0699543
	101255098	-1.62543	0.0699543
	778343	-1.32773	0.0779232
	101254427	-4.21523	0.0779931
	101255226	-2.92271	0.0817674
	104647168	-1.31334	0.0822656
	101248994	-3.25604	0.0874569
	101262489	-1.97844	0.0890654
	101266327	-1.20413	0.0890654
	101262680	-2.52145	0.0989897
	101265125	-2.36354	0.0993069
	101243775	-1.48435	0.0993069
	101250767	1.82035	0.000216954
	101245941	1.64615	0.000333277
	101244371	3.5573	0.000895256
	100125906	3.40921	0.000924328
	101260459	1.76827	0.00108598
	101252191	2.08616	0.00129732
	101254084	1.55063	0.00199006
	104648221	1.91176	0.00204465
	104647827	2.08923	0.00239234
	101265525	1.84006	0.00249654
	101252689	1.79503	0.00360399
	101258933	1.51301	0.00547401
	3950409	1.62331	0.00641586
	DEG	2l/ha vs NT, 48h
	genename	log2FC	adj-p
	101244155	-2.1251	0.00087185
	543915	-2.32932	0.00107323
	101261260	-1.68195	0.00670022
	101245618	-2.10184	0.0313415
	101265588	-1.92057	0.0622524
	101268888	-2.08876	0.0700872
	101266265	-1.61048	0.0701084
	778214	-1.72407	0.0806975
	101254950	-1.59864	0.0986041
	544123	5.80344	4.33344e-20
	101252465	3.14715	0.000377523
	109120159	2.34927	0.0146159
	543986	2.97307	0.0152069
	544149	1.9626	0.0580307
	101253788	1.76129	0.0699023
	544268	1.64732	0.0701084
	101259599	1.63577	0.0806975

## Sheet: BBCH65
Supplementary table 4C. Gene Ontology enrichment analysis of DEGs after ANE treatment at BBCH65 in different comparisons according to dose (1l ha-1 and 2l ha -1) and sampling time (24 h and 48h). Biological process, molecular function and cellular component for down-regulated (blue) and up-regulated (red) genes (adj-p < 0.1 and log2FC ≤ -1) in treated plants compared to the untreated ones.
					GO enrichment analysis
	DEG	1l/ha vs NT, 24h			DOWNREGULATED GENES (1l/ha vs NT, 24h)					UPREGULATED GENES (1l/ha vs NT, 24h)
	genename	log2FC	adj-p		Enrichment FDR	Fold Enrichment	Pathway	Genes		Enrichment FDR	Fold Enrichment	Pathway	Genes
	101268830	-4.76371	2.37463e-07		BIOLOGICAL PROCESS					BIOLOGICAL PROCESS
	101246420	-2.73095	4.43465e-07		0.00130049	253.154	Isoleucine metabolic process	101247891 101257242		0.0224099	409.869	Ammonium transport	101265282
	101267358	-4.26024	4.06995e-05		0.0397768	112.513	Locomotion	101255248		0.0224099	409.869	Phosphate ion transmembrane transport	101244142
	543758	-3.07728	8.40167e-05		0.0397768	112.513	Tricarboxylic acid metabolic process	101268602		0.0224099	409.869	Asparagine metabolic process	101245157
	101259357	-6.82253	0.00036836		0.0397768	112.513	Sodium ion transport	101257524		0.0224099	409.869	Positive regulation of flower development	101254900
	544312	-4.52837	0.000375789		0.000843042	94.9329	Cell wall macromolecule catabolic process	543515 101267358 544148		0.024802	318.787	Flavonoid biosynthetic process	778295
	101262489	-4.08277	0.000375789		0.00327273	92.0561	Aminoglycan catabolic process	101267358 544148		0.0279738	143.454	Calcium ion transmembrane transport	101260132
	101259309	-2.40993	0.000580478		0.0448954	92.0561	Homoserine metabolic process	101258465		0.00543556	30.4143	Ion transmembrane transport	101260132 101265282 101244142
	101258465	-2.49636	0.000995478		0.0448954	84.3848	Cell wall polysaccharide catabolic process	543515		0.0224099	25.9646	Cation transmembrane transport	101260132 101265282
	544148	-2.47167	0.001718		0.00448251	65.3302	Response to cadmium ion	543564 101247578		MOLECULAR FUNCTION
	101247723	-2.94437	0.00172302		0.00327273	26.6478	Alpha-amino acid biosynthetic process	101247891 101258465 101257242		0.0199608	409.869	Ammonium transmembrane transporter activity	101265282
	101260756	-2.50989	0.00172302		0.0270315	19.8552	Polysaccharide catabolic process	543515 544148		0.0199608	358.635	Oxidoreductase activity, acting on the CH-OH group of donors, oxygen as acceptor	101251417
	543564	-3.60787	0.00188801		0.00327273	14.466	Response to external stimulus	101255248 100134875 544148 543876		0.0242574	204.935	P-type calcium transporter activity	101260132
	101266935	-1.81877	0.00188801		0.0113047	14.0641	Metal ion transport	543564 101247578 101257524		0.0242574	179.318	Sulfate transmembrane transporter activity	101244142
	544187	-1.6086	0.0019613		0.0397768	13.7771	Immune system process	100134875 544148		0.0242574	136.623	Threonine-type peptidase activity	101245157
	112941539	-3.34981	0.00217751		0.0448954	12.2742	Organic hydroxy compound metabolic process	101268602 101264777		0.0242574	110.349	Purine nucleoside transmembrane transporter activity	101262171
	101244606	-2.7595	0.00217751		0.0270315	8.98773	Defense response	101264919 100134875 544148		0.00687433	17.0779	Ion transmembrane transporter activity	101260132 101265282 101244142
	101265368	-4.8562	0.00273912		0.0267031	6.32886	Macromolecule catabolic process	101255625 543515 101267358 544148		0.0242574	14.9043	Cation transmembrane transporter activity	101260132 101265282
	101254849	-3.84722	0.00273912		0.0270315	5.98297	Carboxylic acid metabolic process	101268602 101247891 101258465 101257242		0.0284433	11.4993	Active transmembrane transporter activity	101260132 101244142
	101247023	-1.80301	0.00273912		0.0130154	5.83978	Carbohydrate metabolic process	543515 543609 101254849 101267358 544148		0.00687433	9.32277	Transporter activity	101262171 101260132 101265282 101244142
	543656	-3.34865	0.00274698		0.0270315	4.4452	Response to stress	101264919 543564 100134875 544148 101247578		KEGG
	543990	-1.57884	0.00281413		MOLECULAR FUNCTION					0.031224	95.6361	Alanine, aspartate and glutamate metabolism	101245157
	101245886	-2.38647	0.00401101		0.0408848	168.77	Isocitrate dehydrogenase activity	101268602		0.0378251	7.9476	Biosynthesis of secondary metabolites	101245157 778295
	544061	-6.67761	0.00471947		0.0408848	168.77	Alpha-L-arabinofuranosidase activity	543515
	100191111	-7.13035	0.00521823		0.0440087	144.66	Amino acid kinase activity	101258465
	543609	-2.90102	0.00521823		0.048921	84.3848	Beta-galactosidase activity	543609
	112940036	-6.51223	0.00758316		0.048921	84.3848	Transketolase or transaldolase activity	101247891
	101257242	-2.04688	0.008517		0.048921	84.3848	Strictosidine synthase activity	543656
	100736473	-1.97986	0.008517		0.048921	84.3848	Protein domain specific binding	101247578
	101254370	-1.64423	0.008517		0.00422509	81.0094	Chitinase activity	101267358 544148
	101268888	-6.96159	0.0105286		0.00698744	49.396	Protein homodimerization activity	101268602 543564
	544097	-4.01122	0.0105286		0.00422509	24.698	Oxidoreductase activity, acting on the CH-OH group of donors, NAD or NADP as acceptor	101268602 101258465 101257242
	101260960	-3.73163	0.0105286		0.00482857	19.8552	Magnesium ion binding	101268602 101262489 101247891
	101255625	-6.31968	0.0106907		0.00187161	13.8336	Hydrolase activity, hydrolyzing O-glycosyl compounds	543515 543609 101254849 101267358 544148
	544034	-4.67632	0.0112526		0.00422509	4.47566	Oxidoreductase activity	101268602 778325 101264777 543564 101258465 101260960 100134875 101257242
	101243703	-2.21834	0.0130404		KEGG
	104648221	-2.13486	0.0131722		0.000285606	168.77	Valine, leucine and isoleucine biosynthesis	101247891 101257242
	101255248	-1.97152	0.0181961		0.015106	168.77	Lysine biosynthesis	101258465
	101257524	-1.76607	0.0198539		1.94133e-05	112.513	2-Oxocarboxylic acid metabolism	101268602 101247891 101257242
	108491835	-1.77623	0.0230679		0.0316014	72.3298	Nitrogen metabolism	778325
	101264089	-4.37067	0.023489		0.0328012	63.2886	Diterpenoid biosynthesis	101262489
	100736500	-3.17175	0.0240853		0.0353355	53.2957	Butanoate metabolism	101247891
	101255100	-1.95006	0.0240853		0.0353355	48.2199	Fatty acid degradation	101260960
	101264952	-2.48877	0.0246786		0.0353355	46.0281	Steroid biosynthesis	101264777
	544123	-2.82501	0.0311931		0.00030427	36.1649	Amino sugar and nucleotide sugar metabolism	543515 101267358 544148
	101262509	-2.30807	0.0362924		3.93076e-05	32.6651	Biosynthesis of amino acids	101268602 101247891 101258465 101257242
	101264919	-4.95815	0.0372969		0.0112376	21.5451	MAPK signaling pathway	101267358 544148
	101259539	-3.15622	0.0375726		4.63985e-06	11.2201	Biosynthesis of secondary metabolites	101268602 101264777 101262489 101247891 101258465 101260960 100134875 101257242
	101243853	-4.94209	0.0392716		3.546e-07	9.0633	Metabolic pathways	101268602 543515 778325 101264777 101247891 101258465 101260960 100134875 101267358 544148 101257242
	101247891	-1.48811	0.0392716
	101268602	-1.44555	0.0420175
	101257896	-1.92385	0.0424481		DOWNREGULATED GENES (2l/ha vs NT, 24h)					UPREGULATED GENES (2l/ha vs NT, 24h)
	100134875	-1.47578	0.0537677		Enrichment FDR	Fold Enrichment	Pathway	Genes		Enrichment FDR	Fold Enrichment	Pathway	Genes
	101247578	-1.73707	0.0543012		BIOLOGICAL PROCESS					BIOLOGICAL PROCESS
	543876	-1.69712	0.0566558		0.0208665	191.272	Diterpenoid metabolic process	101262489		0.0151034	819.738	Response to nematode	101256570
	101262161	-2.23334	0.0578031		0.00292316	68.9269	Lipid localization	101266080 544034		0.0151034	546.492	S-adenosylmethionine metabolic process	101245012
	543515	-1.65691	0.0578031		0.0378478	9.50421	Organic substance transport	101266080 544034		0.0151034	378.341	Regulation of seed germination	544052
	101268869	-1.60684	0.0578031		MOLECULAR FUNCTION					0.00562426	218.597	Response to fatty acid	101256570 544052
	544228	-1.47362	0.0578031		0.0164438	273.246	Amine-lyase activity	543656		0.0176924	213.845	Cytosolic transport	101262189
	101247392	-2.36666	0.0615249		0.0187798	191.272	Beta-glucosidase activity	101254849		0.0243246	87.8291	Recognition of pollen	101267468
	101246670	-4.61459	0.069916		0.0263326	85.0099	Terpene synthase activity	101262489		0.0298938	61.4804	Phosphorelay signal transduction system	101265701
	101248173	-1.18827	0.0731546		0.0164438	34.004	Lipid binding	101266080 544034		0.0151034	27.7877	Intracellular signal transduction	101265701 101262189
	778325	-1.70107	0.0772073		0.0164438	22.3058	Lyase activity	101262489 543656		0.0151034	25.5503	Reproductive process	544052 101267468
	544082	-2.34185	0.0786696		KEGG					0.0151034	17.5033	Cell communication	101265701 101262189 101267468
	104644967	-4.68762	0.0867732		0.016419	239.09	Diterpenoid biosynthesis	101262489		0.0151034	12.2961	Cellular response to stimulus	101265701 101262189 544052
	100736441	-1.45634	0.0867732		0.016419	182.164	Fatty acid degradation	101260960		MOLECULAR FUNCTION
	101264777	-1.20192	0.0990236		0.0210863	10.5968	Biosynthesis of secondary metabolites	101262489 101260960		0.0402392	819.738	1-aminocyclopropane-1-carboxylate oxidase activity	544052
	778295	4.18854	4.47241e-05							KEGG
	101247655	2.31419	0.000236211							0.00046711	146.819	Cysteine and methionine metabolism	544052 101245012
	101257615	2.52629	0.00125716							0.0303025	39.6647	Biosynthesis of amino acids	101245012
	544008	2.55828	0.00172302							0.0303025	35.3844	Plant hormone signal transduction	101265701
	544015	2.14959	0.00424105							0.0303025	32.5724	Biosynthesis of cofactors	101245012
	101266481	2.42983	0.00521823							0.0257986	13.6245	Biosynthesis of secondary metabolites	544052 101245012
	101248118	3.62137	0.00811318							0.0303025	8.00395	Metabolic pathways	544052 101245012
	104647403	3.72142	0.008517
	101264616	1.86778	0.00868909
	101250905	2.95687	0.0112526		DOWNREGULATED GENES (2l/ha vs NT, 48h)					UPREGULATED GENES (2l/ha vs NT, 48h)
	101262171	2.96111	0.0139069		Enrichment FDR	Fold Enrichment	Pathway	Genes		Enrichment FDR	Fold Enrichment	Pathway	Genes
	101245157	3.15371	0.0141137		BIOLOGICAL PROCESS					BIOLOGICAL PROCESS
	101247577	2.32748	0.0169098		0.0115403	1434.54	Putrescine metabolic process	544209		3.46987e-07	625.982	Photosynthesis, light harvesting in photosystem I	101253628 101252151 101265617
	101260132	2.51764	0.0170801		0.0115403	614.804	Ornithine metabolic process	544209		0.0221091	284.537	Homoserine metabolic process	101258465
	101265282	1.59844	0.0179374		0.0115403	430.363	Cellular response to nitrogen levels	101251684		0.0292139	195.619	Chlorophyll biosynthetic process	101257518
	101244100	1.87961	0.0187613		0.0115403	374.228	Polyamine metabolic process	544209		5.24576e-06	195.619	Protein-chromophore linkage	101253628 101252151 101265617
	101252509	2.45157	0.0202216		0.0115403	286.908	Cellular response to starvation	101251684		0.046255	104.33	Chlorophyll metabolic process	101257518
	101244371	4.3621	0.0240853		0.0115403	277.653	Cellular biogenic amine biosynthetic process	544209		1.05421e-06	101.786	Photosynthesis, light reaction	543931 101253628 101252151 101265617
	112941974	1.77216	0.0264397		0.0115403	183.133	Response to nutrient levels	101251684		2.06375e-09	83.4642	Photosynthesis	543931 101268297 101253628 101257518 101252151 101265617
	101263372	3.44852	0.0352476		0.011891	165.524	Response to extracellular stimulus	101251684		0.000160016	53.0493	Response to light stimulus	101253628 101252151 101265617
	101251417	2.295	0.0363263		0.0154262	116.314	Amine metabolic process	544209		8.67243e-05	27.2166	Response to abiotic stimulus	101254918 101253628 101252151 101265617
	101245664	1.96367	0.0372969		0.011891	15.1137	Response to stress	101251684 101262669		MOLECULAR FUNCTION
	104648655	2.22171	0.0392716		MOLECULAR FUNCTION					0.0125134	447.13	Amino acid kinase activity	101258465
	544150	3.76537	0.0513123		0.0218234	94.5852	Protein-disulfide reductase activity	101251684		0.0134033	347.768	Phosphotransferase activity, carboxyl group as acceptor	101258465
	101263790	2.856	0.053027		0.0218234	77.5428	Carbon-carbon lyase activity	544209		7.74545e-06	223.565	Chlorophyll binding	101253628 101252151 101265617
	101055596	2.30779	0.0537677		0.0218234	72.9428	Oxidoreductase activity, acting on a sulfur group of donors	101251684		0.000483208	184.112	Manganese ion binding	101250583 101254918
	101244266	2.49421	0.0578031		0.0413375	31.8787	Electron transfer activity	101251684		0.0305696	130.413	Electron transporter, transferring electrons within the cyclic electron transport pathway of photosynthesis activity	543931
	104645691	3.07369	0.0578031		KEGG					0.0365861	89.426	Pectinesterase inhibitor activity	101260787
	543626	3.26144	0.0578031		0.0106677	232.628	Arginine and proline metabolism	544209		0.0365861	84.5921	Aspartyl esterase activity	101260787
	101260111	2.63744	0.0739497		0.0106677	187.114	Glutathione metabolism	544209		0.0499782	50.4824	NADP binding	101258465
	101250282	1.42681	0.0752182							0.00430141	17.0104	Tetrapyrrole binding	101253628 101252151 101265617
	101257623	2.77837	0.0800314							0.0487592	5.18769	Oxidoreductase activity	543931 101258465 101257518
	101244142	1.873	0.0867732							KEGG
	101251233	1.92727	0.0867732							3.46321e-08	722.287	Photosynthesis	101253628 101252151 101265617
	101266201	1.35604	0.088988							0.00478899	521.652	Lysine biosynthesis	101258465
	109119111	2.66995	0.0890603							0.0222322	86.9419	Porphyrin and chlorophyll metabolism	101257518
	101254900	1.677	0.0972928							0.0222322	74.5216	Glycine, serine and threonine metabolism	101258465
	101245477	1.40767	0.0988377							0.0231094	61.3708	Pentose and glucuronate interconversions	101260787
										0.0236736	46.7151	Cysteine and methionine metabolism	101258465
	DEG	2l/ha vs NT, 24h								0.0389175	25.2412	Biosynthesis of amino acids	101258465
	genename	log2FC	adj-p							3.86559e-09	20.3737	Metabolic pathways	543931 101260787 101258465 101268297 101253628 101257518 101252151 101265617
	100736441	-2.25571	0.000290543							0.0236736	8.67011	Biosynthesis of secondary metabolites	101258465 101257518
	101264605	-3.18986	0.000424702
	101266080	-2.21762	0.00137363
	101245886	-2.34788	0.00137363
	101262489	-3.16551	0.00137363
	543656	-3.29754	0.00137363
	104646584	-5.12042	0.00137363
	544034	-5.36522	0.00137363
	101259357	-5.51246	0.00137363
	544097	-1.95294	0.00204532
	112940036	-3.50048	0.00480938
	101246420	-1.43319	0.0195109
	101254950	-1.68048	0.020625
	101254849	-2.43929	0.0558788
	101255100	-1.6593	0.0696868
	101244606	-1.81085	0.0815012
	101247369	-1.99617	0.0825384
	101260960	-2.76375	0.0825384
	544061	-6.64583	0.0825384
	101263342	-1.80665	0.099686
	544107	4.18441	0.000424702
	544052	2.3598	0.00137363
	101250219	2.46659	0.00204532
	544123	2.09985	0.00569622
	101267468	2.02059	0.00696181
	101265539	2.00895	0.0142082
	101244399	1.82824	0.033682
	104648396	1.99958	0.035367
	101259546	2.56886	0.0505122
	101245012	1.57937	0.0558788
	101256570	2.29814	0.0603296
	778308	2.2822	0.0825384
	101266119	2.04765	0.0873674
	101262189	6.26558	0.999704
	778273	1.80879	0.099686
	101265701	1.77802	0.099686
	101250479	2.57572	0.0997302
	101266879	2.3342	0.0997302
	DEG	2l/ha vs NT, 48h
	genename	log2FC	adj-p
	101251684	-2.97751	1.55642e-10
	101266128	-4.21728	3.75274e-09
	101259781	-7.44146	0.000721607
	101249063	-7.14252	0.00113522
	544209	-1.86017	0.022101
	101262669	-1.93699	0.0509252
	101244167	-1.76291	0.0846671
	101263441	-1.50519	0.0853982
	101266025	-2.17574	0.0915519
	101266771	-1.20928	0.0965057
	544082	2.26981	0.000721607
	101254918	1.98542	0.00113522
	101260787	1.65246	0.0159439
	101250583	2.35769	0.0163225
	101263901	1.79668	0.022101
	543758	1.60544	0.0314941
	101258465	1.35599	0.0500039
	543931	1.47536	0.0500039
	101252151	1.5944	0.0500039
	104645884	1.71656	0.0500039
	101257518	1.21415	0.0707253
	101265617	1.19638	0.0794648
	101268297	1.27798	0.0794648
	544267	1.54216	0.0794648
	101245729	1.15862	0.0965057
	101253628	1.19442	0.0965057
	101253094	1.31665	0.0965057
	3950454	1.36514	0.0965057
